# Supplementary material
Source: PubMed Central journal article supplement (PMC5566304)
Supplement: AnnalsATS.201607-538OC_hope_data_supplement.pdf [file AnnalsATS.201607-538OC_hope_data_supplement.pdf]

## **Online Data Supplement**

### **Assessing the Utility and Validity of Frailty Markers in Critically Ill Adults**

Aluko A. Hope, S. J. Hsieh, Alex Petti, Mariana Hurtado-Sbordoni, Joe Verghese, Michelle Ng.  
Gong

**Table E1.** Overview of Frailty Markers

| Frailty Markers                     | Question or Instrument                                                                                                                                                                                                                                                                                                                                                                                                                                             | Frailty Criteria                                                                                                              |
|-------------------------------------|--------------------------------------------------------------------------------------------------------------------------------------------------------------------------------------------------------------------------------------------------------------------------------------------------------------------------------------------------------------------------------------------------------------------------------------------------------------------|-------------------------------------------------------------------------------------------------------------------------------|
| Weight Loss/Malnutrition            | <p>During the LAST YEAR, would you say the patient has lost weight?<br/>           Approximately, how much weight would you say the patient lost in the last year (in kgs)?</p>                                                                                                                                                                                                                                                                                    | <p>Yes to weight loss and BMI &lt; 24 OR<br/>           ≥5% weight loss (weight loss in kg/(Patient weight in kgs) x 100)</p> |
| Decreased Energy                    | <p>How often during the 4 WEEKS prior to the current hospitalization did the patient feel like everything is an effort or that he/she could not get going? (1-rarely or not all; 2-occasionally; 3-often; 4-usually; 5-Don't know)<br/>           OR<br/>           How much of the time during the 4 WEEKS prior to the current hospitalization did the patient have a lot of energy? (1-rarely or not all; 2-occasionally; 3-often; 4-usually; 5-Don't know)</p> | <p>Patients who "usually" couldn't get going OR<br/>           Patients who "rarely" had a lot of energy</p>                  |
| Decreased Mobility                  | <p>In the past YEAR before the current hospitalization<br/>           a) Did the patient have any falls?<br/>           b) Did the patient need personal assistance in order to travel in or outside the home? (1- rarely or not at all; 2-occasionally; 3-often; 4-usually)</p>                                                                                                                                                                                   | <p>≥ 1 fall in the past year OR<br/>           People who "often" or "usually" needed personal assistance</p>                 |
| Decreased Strength                  | <p>Could the patient rise from a chair <i>without</i> using their arms for assistance?</p>                                                                                                                                                                                                                                                                                                                                                                         | <p>No</p>                                                                                                                     |
| Impaired Moderate Physical Activity | <p>In the past YEAR before the current hospitalization:<br/>           a) Did the patient's health limit their ability to climb one flight of stairs? OR<br/>           b) Did the patient's health limit their ability to do moderate activities like moving a table, pushing a vacuum cleaning, bowling or dancing?</p>                                                                                                                                          | <p>Yes to either a) or b)</p>                                                                                                 |
| Cognitive Impairment                | <p>Memory Impairment Screen (MIS)<br/>           OR modified version of the Short-Form Informant Questionnaire on Cognitive Decline in the Elderly (IQCODE)</p>                                                                                                                                                                                                                                                                                                    | <p>MIS score ≤ 4 OR<br/>           IQCODE &gt;3.3</p>                                                                         |

---

|                    |                                                                                 |                        |
|--------------------|---------------------------------------------------------------------------------|------------------------|
| Sensory Impairment | Over the past YEAR before the current hospitalization:                          | Yes to either a) or b) |
|                    | a) Did the patient experience problems in daily life because of poor vision? OR |                        |
|                    | b) Did they experience problems because of being hard of hearing?               |                        |

---
